# Supplementary material for: Serum folate and vitamin B12: does light really matter?
Source: publisher site journal article supplement (doi:10.1515/cclm-2014-0254), 2014-01-01
Supplement: Supplementary file 1 [file cclm-2014-0254.zip]

| Folates | T0    | T2h   | T4h   |
|---------|-------|-------|-------|
|         | 4,49  | 4,05  | 4,18  |
|         | 5,62  | 5,68  | 5,9   |
|         | 9,31  | 9,44  | 9,26  |
|         | 9,87  | 9,3   | 9,35  |
|         | 4,15  | 4,39  | 4,57  |
|         | 1,89  | 2,17  | 2,29  |
|         | 6,47  | 6,34  | 6,43  |
|         | 9,02  | 8,37  | 7,77  |
|         | 6,6   | 6,9   | 3,48  |
|         | 4,02  | 3,91  | 3,48  |
|         | 2,95  | 3,48  | 2,94  |
|         | 3,45  | 2,88  | 2,86  |
|         | 4,94  | 4,11  | 4,15  |
|         | 6,3   | 5,72  | 6,21  |
|         | 2,97  | 2,82  | 2,83  |
|         | 8,84  | 8,72  | 8,82  |
|         | 5,03  | 4,2   | 4,28  |
|         | 3,36  | 2,99  | 3,09  |
|         | 8,84  | 8,38  | 8,21  |
|         | 3,93  | 3,35  | 3,39  |
|         | 3,13  | 3,09  | 3,38  |
|         | 18,17 | 18,05 | 17,95 |
|         | 3,65  | 3,23  | 3,29  |
|         | 9,47  | 9,45  | 9,27  |
|         | 5,74  | 5,64  | 6,12  |
|         | 4,89  | 5,1   | 4,47  |
|         | 6,15  | 6,51  | 7,03  |
|         | 5,94  | 6,43  | 6,84  |
|         | 3,63  | 3,69  | 4,17  |
|         | 5,52  | 5,01  | 5,08  |
|         | 6,43  | 6,31  | 6,87  |
|         | 7,42  | 6,95  | 5,86  |
|         | 7,25  | 7,41  | 5,86  |
|         | 4,32  | 3,25  | 4,18  |
|         | 9,71  | 8,37  | 9,44  |
|         | 10,45 | 10,55 | 10,39 |
|         | 11,19 | 10,7  | 10,67 |
|         | 1,62  | 2,16  | 2,5   |
|         | 6,16  | 6,7   | 6,49  |
|         | 3,79  | 3,69  | 3,56  |
|         | 5,38  | 5,4   | 5,79  |
|         | 7,63  | 7,84  | 7,31  |
|         | 4,9   | 5,15  | 4,73  |
|         | 4,25  | 4,46  | 4,64  |
|         | 7,2   | 6,68  | 7,52  |
|         | 8,36  | 7,7   | 8,05  |
|         | 4,51  | 4,78  | 4,47  |
|         | 5,11  | 5,41  | 4,9   |
|         | 4,65  | 5,11  | 4,65  |
|         | 3,07  | 3,78  | 3,51  |
|         | 9,3   | 9,55  | 9,04  |
|         | 3,35  | 3,24  | 3,52  |
|         | 11,85 | 11,4  | 11,72 |
|         | 6,95  | 7,43  | 7,53  |
|         | 4,36  | 4,41  | 3,32  |

|  |       |       |       |
|--|-------|-------|-------|
|  | 12,16 | 10,74 | 9,83  |
|  | 6,07  | 6,21  | 4,99  |
|  | 6,22  | 6,82  | 5,57  |
|  | 2,27  | 2,55  | 1,57  |
|  | 10,84 | 10,53 | 9,98  |
|  | 5,82  | 5,75  | 5,3   |
|  | 6,25  | 6,49  | 6,57  |
|  | 11,52 | 9,73  | 8,92  |
|  | 5,91  | 4,99  | 4,98  |
|  | 12,28 | 11,2  | 11,27 |
|  | 5,4   | 4,56  | 4,48  |
|  | 2,2   | 1,21  | 1,9   |
|  | 5,29  | 4,19  | 5,21  |
|  | 8,49  | 8,5   | 7,82  |
|  | 5,02  | 4,76  | 4,01  |
|  | 5,96  | 6,37  | 6,17  |
|  | 6,17  | 5,64  | 5,67  |
|  | 6,43  | 5,71  | 5,23  |
|  | 7,91  | 7,57  | 7,36  |
|  | 7,63  | 7,01  | 6,85  |
|  | 5,41  | 5,86  | 5,89  |
|  | 5,07  | 5,24  | 4,98  |
|  | 6,91  | 6,97  | 7,07  |
|  | 3,34  | 2,78  | 2,59  |
|  | 6,11  | 6,11  | 5,87  |
|  | 7,69  | 7,53  | 7,65  |
|  | 6,41  | 6,24  | 6,17  |
|  | 3,46  | 3,45  | 3,4   |
|  | 8,27  | 8,23  | 8,27  |
|  | 5,82  | 5,69  | 5,57  |
|  | 5,72  | 6,26  | 6,57  |
|  | 5,43  | 4,76  | 4,66  |
|  | 3,42  | 3,52  | 3,37  |
|  | 5,94  | 5,27  | 5,23  |
|  | 6,36  | 5,45  | 5,66  |
|  | 5,65  | 4,12  | 3,93  |
|  | 16,12 | 13,39 | 13,25 |
|  | 3,88  | 3,51  | 3,45  |
|  | 5,58  | 5,08  | 5,31  |
|  | 4,27  | 3,88  | 4,55  |
|  | 5,43  | 5,05  | 5,32  |
|  | 10,49 | 9,1   | 9,7   |
|  | 8,73  | 9,81  | 10,85 |
|  | 3,38  | 3,38  | 3,33  |
|  | 4,11  | 4,59  | 4,7   |
|  | 2,13  | 2,02  | 1,83  |
|  | 2,74  | 2,79  | 2,81  |
|  | 8,71  | 9,22  | 9,68  |
|  | 11,91 | 13,32 | 14,47 |

| B12 | T0    | T2h   | T4h   |
|-----|-------|-------|-------|
|     | 1533  | 1428  | 1380  |
|     | 296,5 | 297,6 | 299,2 |
|     | 385,6 | 367,6 | 369,1 |
|     | 1195  | 1232  | 1205  |
|     | 1551  | 1533  | 1469  |
|     | 211,5 | 212,8 | 209,2 |
|     | 340,8 | 357,9 | 355,9 |
|     | 1279  | 1294  | 1226  |
|     | 292,4 | 306,1 | 279,2 |
|     | 225,6 | 234,3 | 217,7 |
|     | 425,5 | 447,4 | 401,5 |
|     | 588,5 | 583,5 | 533,4 |
|     | 155,2 | 158,7 | 149,1 |
|     | 974   | 940,9 | 837,3 |
|     | 991,4 | 926,5 | 799,4 |
|     | 690,3 | 671,3 | 602,7 |
|     | 314,7 | 298,4 | 280,8 |
|     | 269,3 | 242,4 | 227,4 |
|     | 445,3 | 419,3 | 407,9 |
|     | 388,3 | 337   | 341,7 |
|     | 297,4 | 258,3 | 257,4 |
|     | 911,7 | 902,1 | 876,6 |
|     | 652,6 | 626,5 | 621,1 |
|     | 1435  | 1337  | 1291  |
|     | 729,4 | 653,7 | 653,1 |
|     | 718,5 | 704,7 | 674,2 |
|     | 522,2 | 499,8 | 466,2 |
|     | 389,7 | 373,3 | 339,8 |
|     | 1316  | 1320  | 1203  |
|     | 612,9 | 602,5 | 575,9 |
|     | 290   | 272,2 | 255,7 |
|     | 574   | 534,7 | 546,1 |
|     | 252,8 | 251,9 | 275   |
|     | 572,7 | 596,8 | 580,2 |
|     | 1706  | 1767  | 1616  |
|     | 508,6 | 486,3 | 452,6 |
|     | 888,7 | 887,9 | 861,2 |
|     | 358,8 | 360,4 | 360,7 |
|     | 225,4 | 211,6 | 208,6 |
|     | 811,9 | 784,5 | 777,1 |
|     | 436   | 422,3 | 437,5 |
|     | 393,9 | 373,3 | 363,6 |
|     | 277,7 | 270,1 | 268   |
|     | 961,1 | 887,9 | 783,4 |
|     | 1237  | 1144  | 1180  |
|     | 464   | 447,1 | 446,7 |
|     | 442,6 | 441,4 | 425,7 |
|     | 1257  | 1199  | 1134  |
|     | 520,5 | 531,9 | 519,4 |
|     | 351,8 | 371,7 | 330,5 |
|     | 351,1 | 368,4 | 364,3 |
|     | 251,8 | 271,6 | 260,8 |
|     | 390,6 | 408,4 | 394,7 |
|     | 543,1 | 565,2 | 532,5 |
|     | 387   | 397,5 | 383,9 |

|  |       |       |       |
|--|-------|-------|-------|
|  | 134,7 | 146   | 150,6 |
|  | 443,5 | 460,3 | 462,3 |
|  | 373,2 | 376   | 375,6 |
|  | 1302  | 1411  | 1384  |
|  | 467,5 | 463,2 | 430,8 |
|  | 627,9 | 592   | 573   |
|  | 616,8 | 579,5 | 550,4 |
|  | 222,8 | 258,8 | 268   |
|  | 863   | 897,4 | 872,2 |
|  | 1045  | 1144  | 1104  |
|  | 214,4 | 251,4 | 246   |
|  | 199,2 | 216,2 | 179,3 |
|  | 509,8 | 556,4 | 492,6 |
|  | 404,3 | 419,5 | 427,4 |
|  | 652,5 | 655,1 | 663,1 |
|  | 605,2 | 611,6 | 624,9 |
|  | 310,9 | 344,2 | 321,6 |
|  | 405,8 | 450,2 | 427,8 |
|  | 129,2 | 162,1 | 165,1 |
|  | 542,7 | 539   | 523,5 |
|  | 319,8 | 301,1 | 265,5 |
|  | 376,1 | 351,4 | 299,2 |
|  | 1190  | 1116  | 1005  |
|  | 316,7 | 315,3 | 312,5 |
|  | 331,5 | 336,7 | 315,4 |
|  | 821,4 | 796,3 | 779,6 |
|  | 306,2 | 316,7 | 314,5 |
|  | 335,5 | 359,5 | 343,9 |
|  | 638,8 | 614,4 | 597   |
|  | 493,1 | 489,7 | 470,5 |
|  | 347,2 | 373,5 | 362,8 |
|  | 438,4 | 442,1 | 429,5 |
|  | 320,3 | 326,5 | 325,3 |
|  | 385,1 | 410,8 | 411   |
|  | 403,8 | 426   | 430,5 |
|  | 191,3 | 223,8 | 223,9 |
|  | 226,6 | 248   | 249,4 |
|  | 369,4 | 355   | 325   |
|  | 482,9 | 456,8 | 437,3 |
|  | 684,1 | 703   | 627,1 |
|  | 725,1 | 732,1 | 678,3 |
|  | 1156  | 1062  | 1016  |
|  | 393,5 | 365,9 | 364,8 |
|  | 720,5 | 645,3 | 641,9 |
|  | 286,1 | 247,8 | 234,5 |
|  | 419,4 | 373,2 | 385,7 |
|  | 344,8 | 303,5 | 293,1 |
|  | 415,9 | 376   | 360,3 |
